# Supplementary material for: From Benchtop to Desktop: Important Considerations when Designing Amplicon Sequencing Workflows
Source: PubMed Central journal article supplement (PMC4406758; doi:10.1371/journal.pone.0124671), 2015-04-22
Supplement: pone.0124671.s001.pdf [file pone.0124671.s001.pdf]

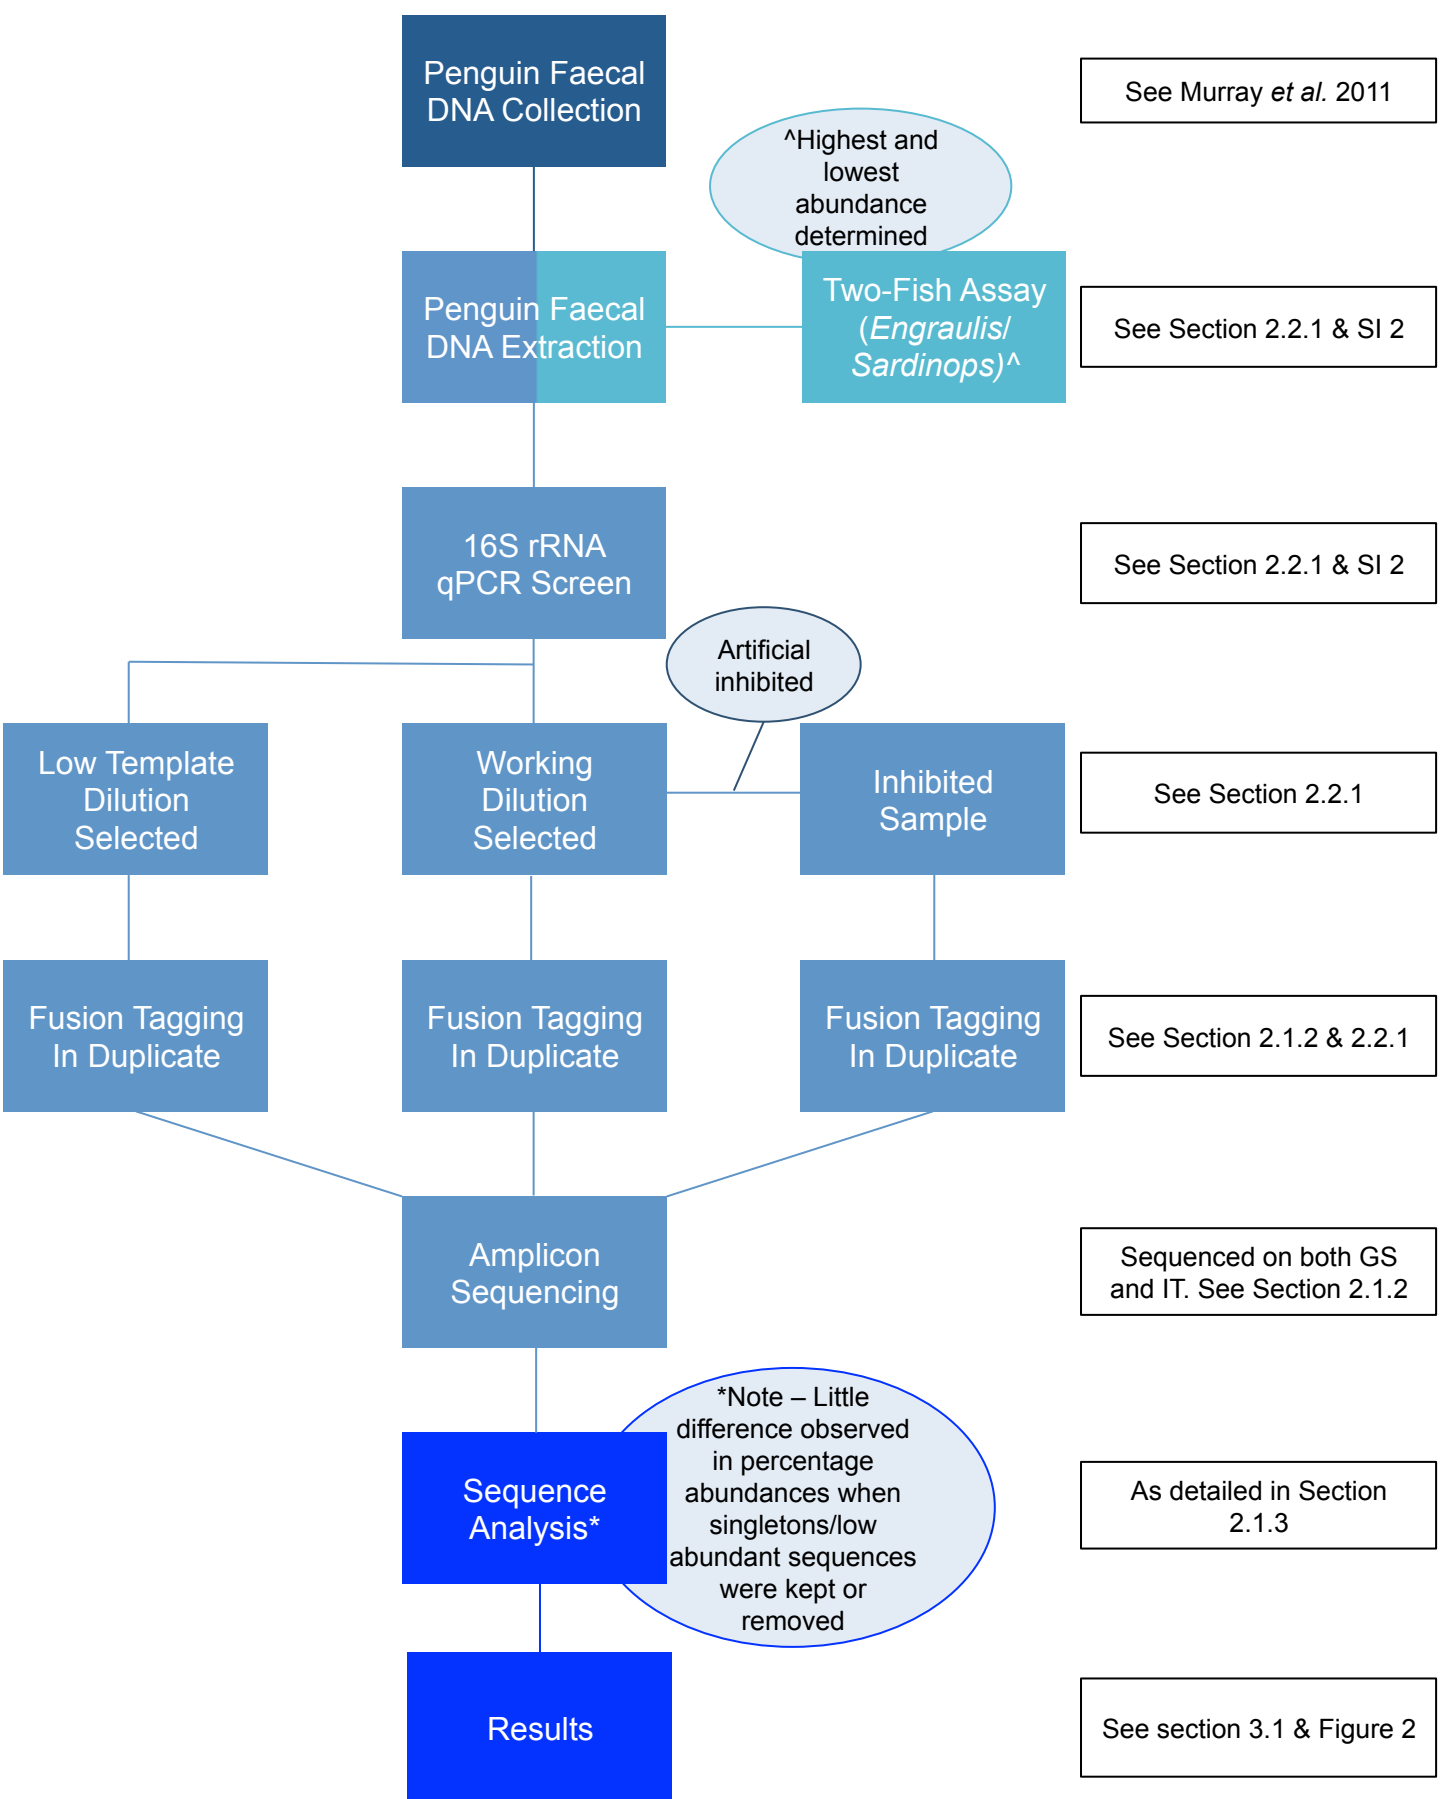

**Figure S1A. Experiment 1: Importance of sample screening.** Schematic showing steps involved in the experiment determining the impact of inhibition and low template amount on the successful detection of two fish genera

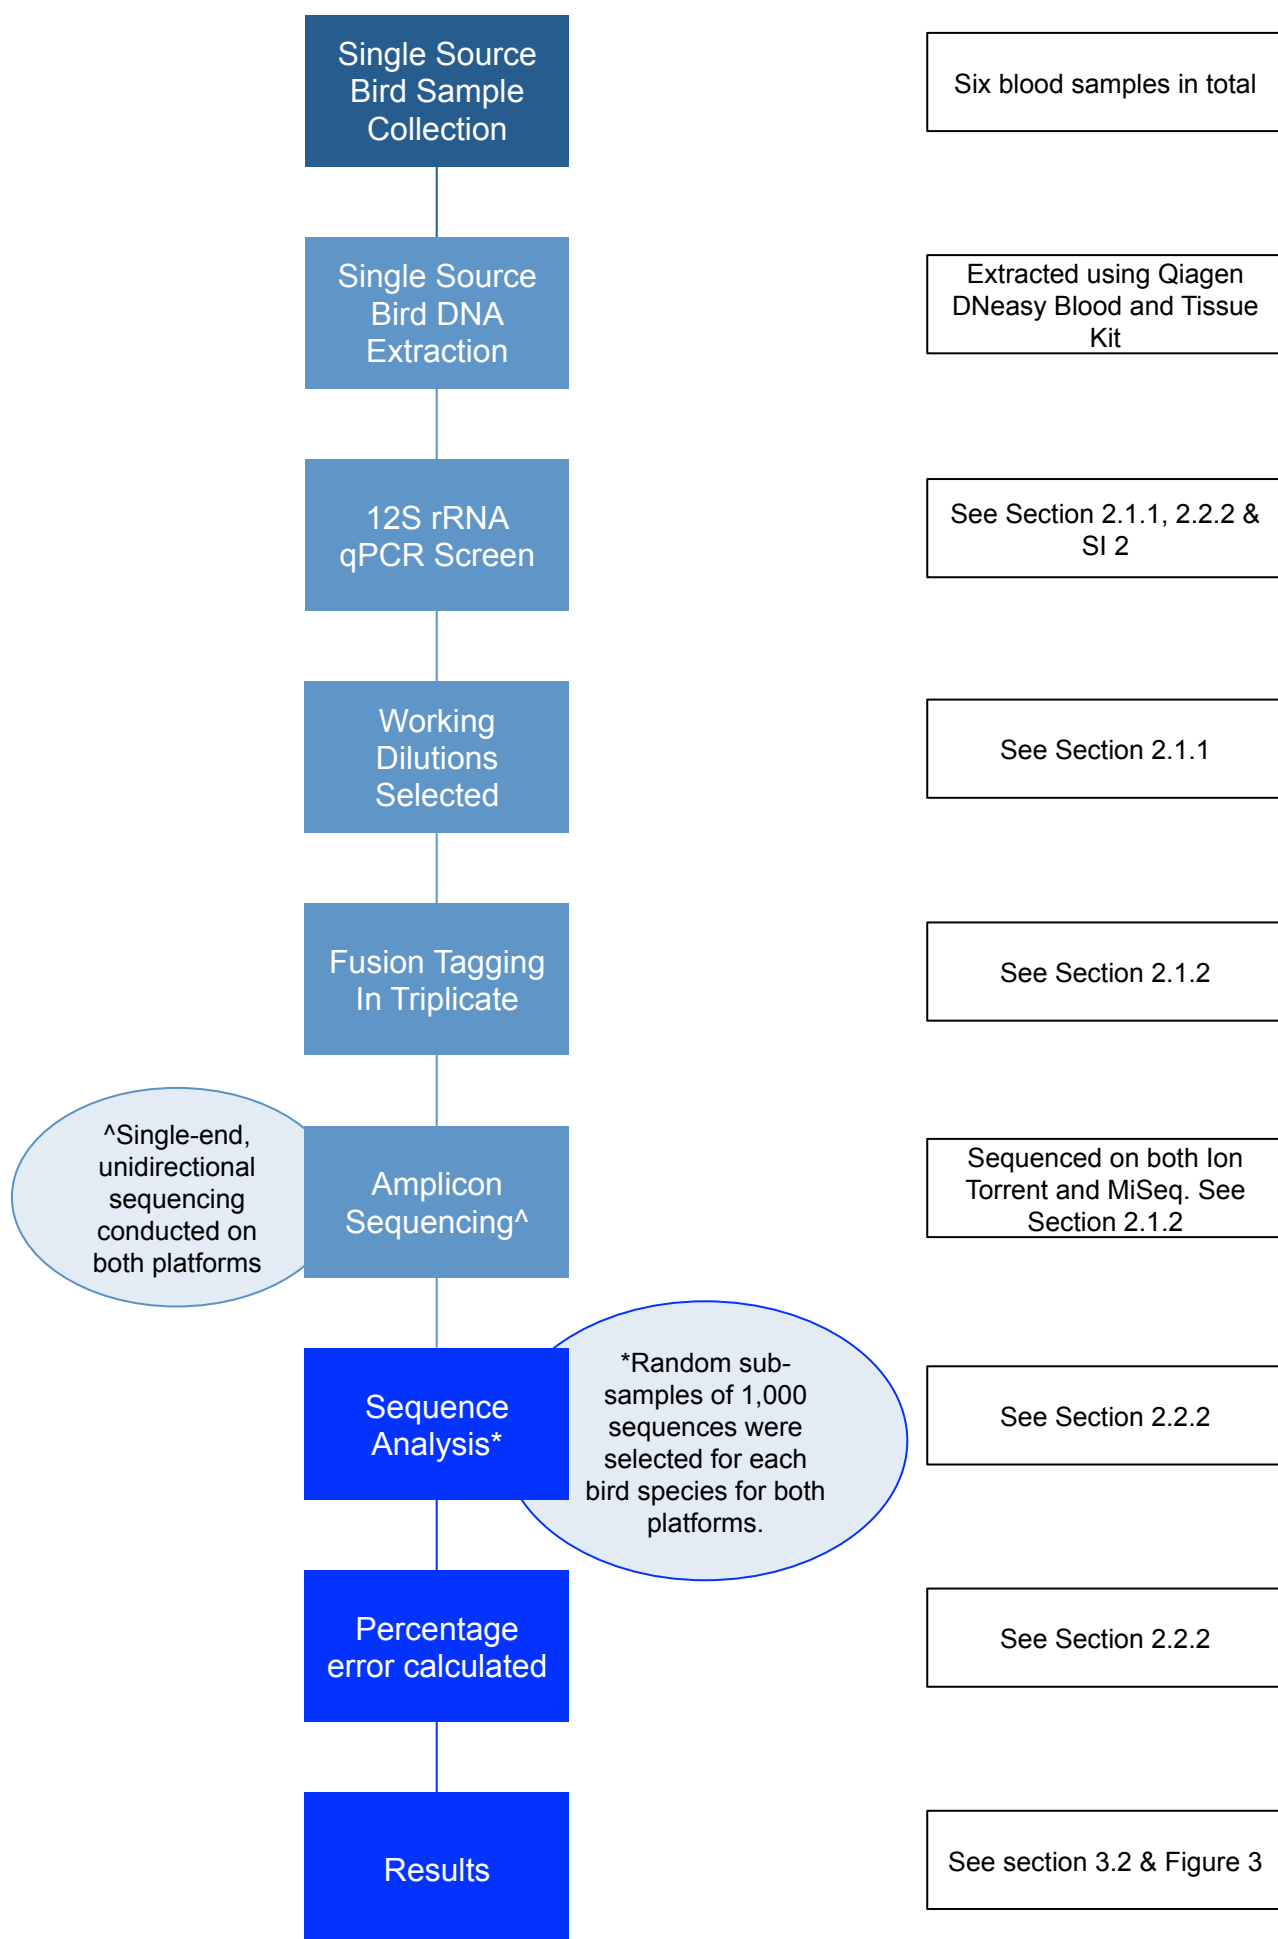

**Figure S1B. Experiment 2: Assessing the amplicon target region.** Schematic showing steps involved in the experiment illustrating the benefits of characterising and understanding the target region in amplicon sequencing

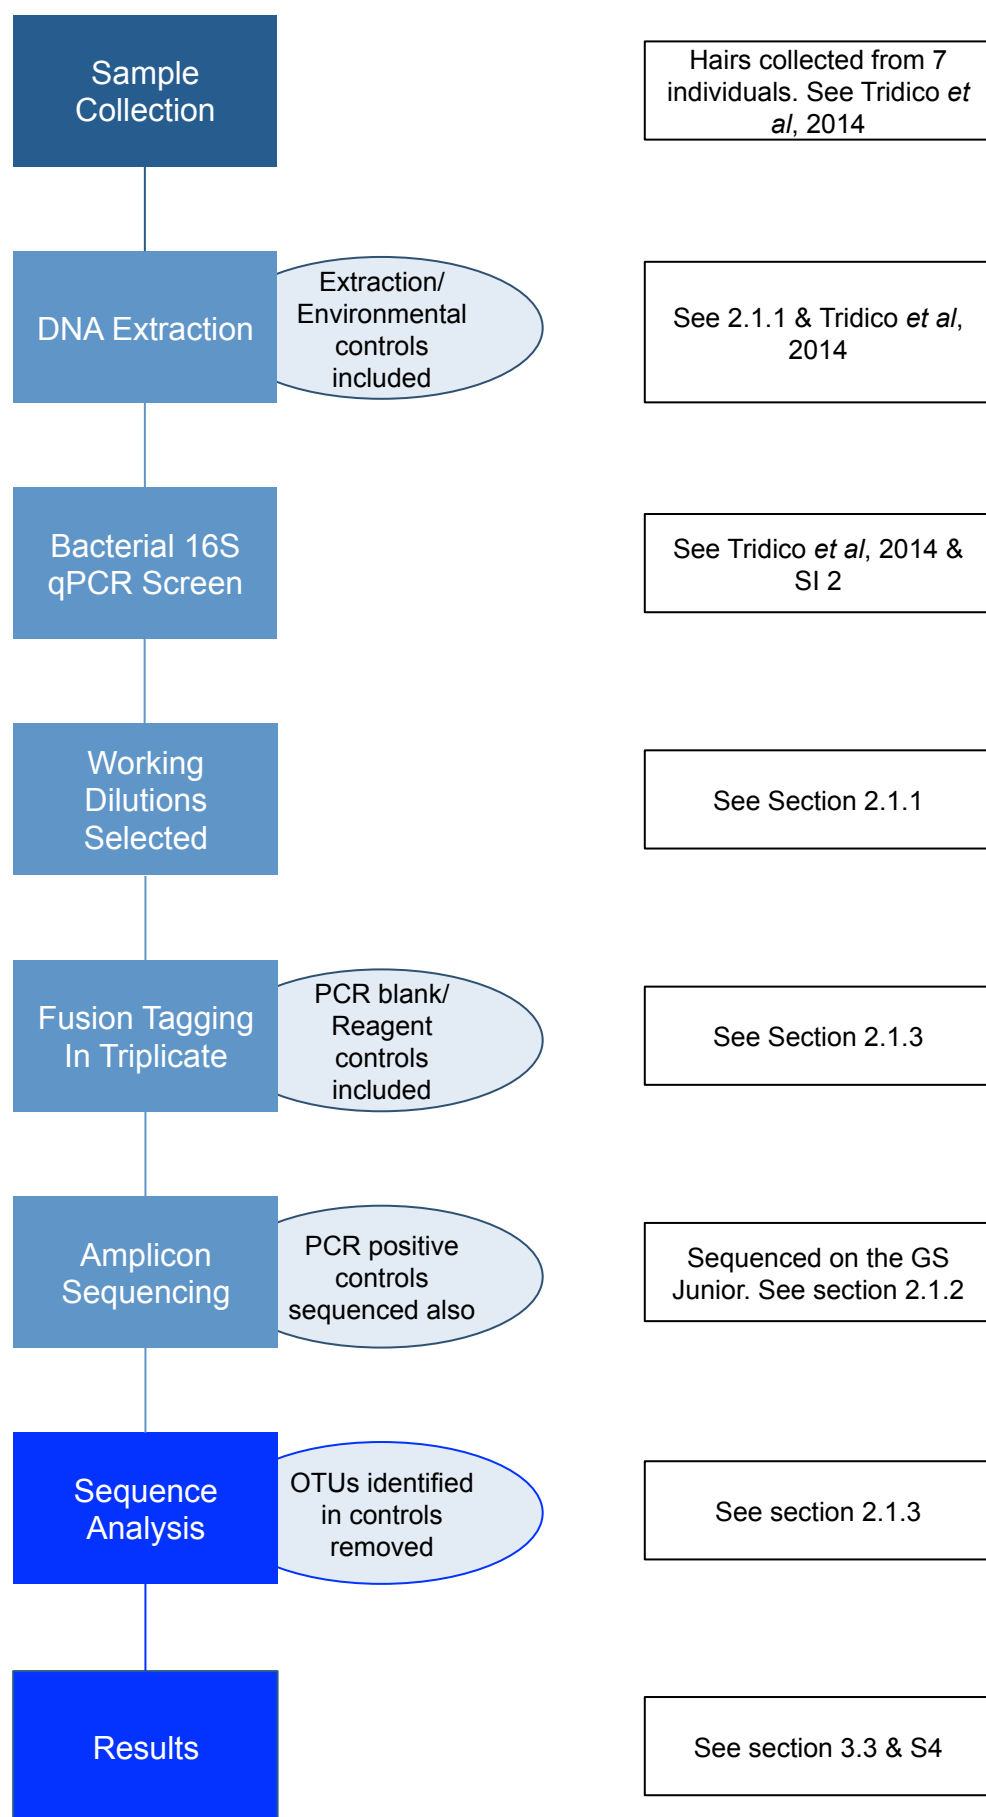

**Figure S1C. Experiment 3: Importance of experimental controls.** Schematic showing steps involved in the experiment illustrating the importance of controls along each step during the preparation of amplicon libraries

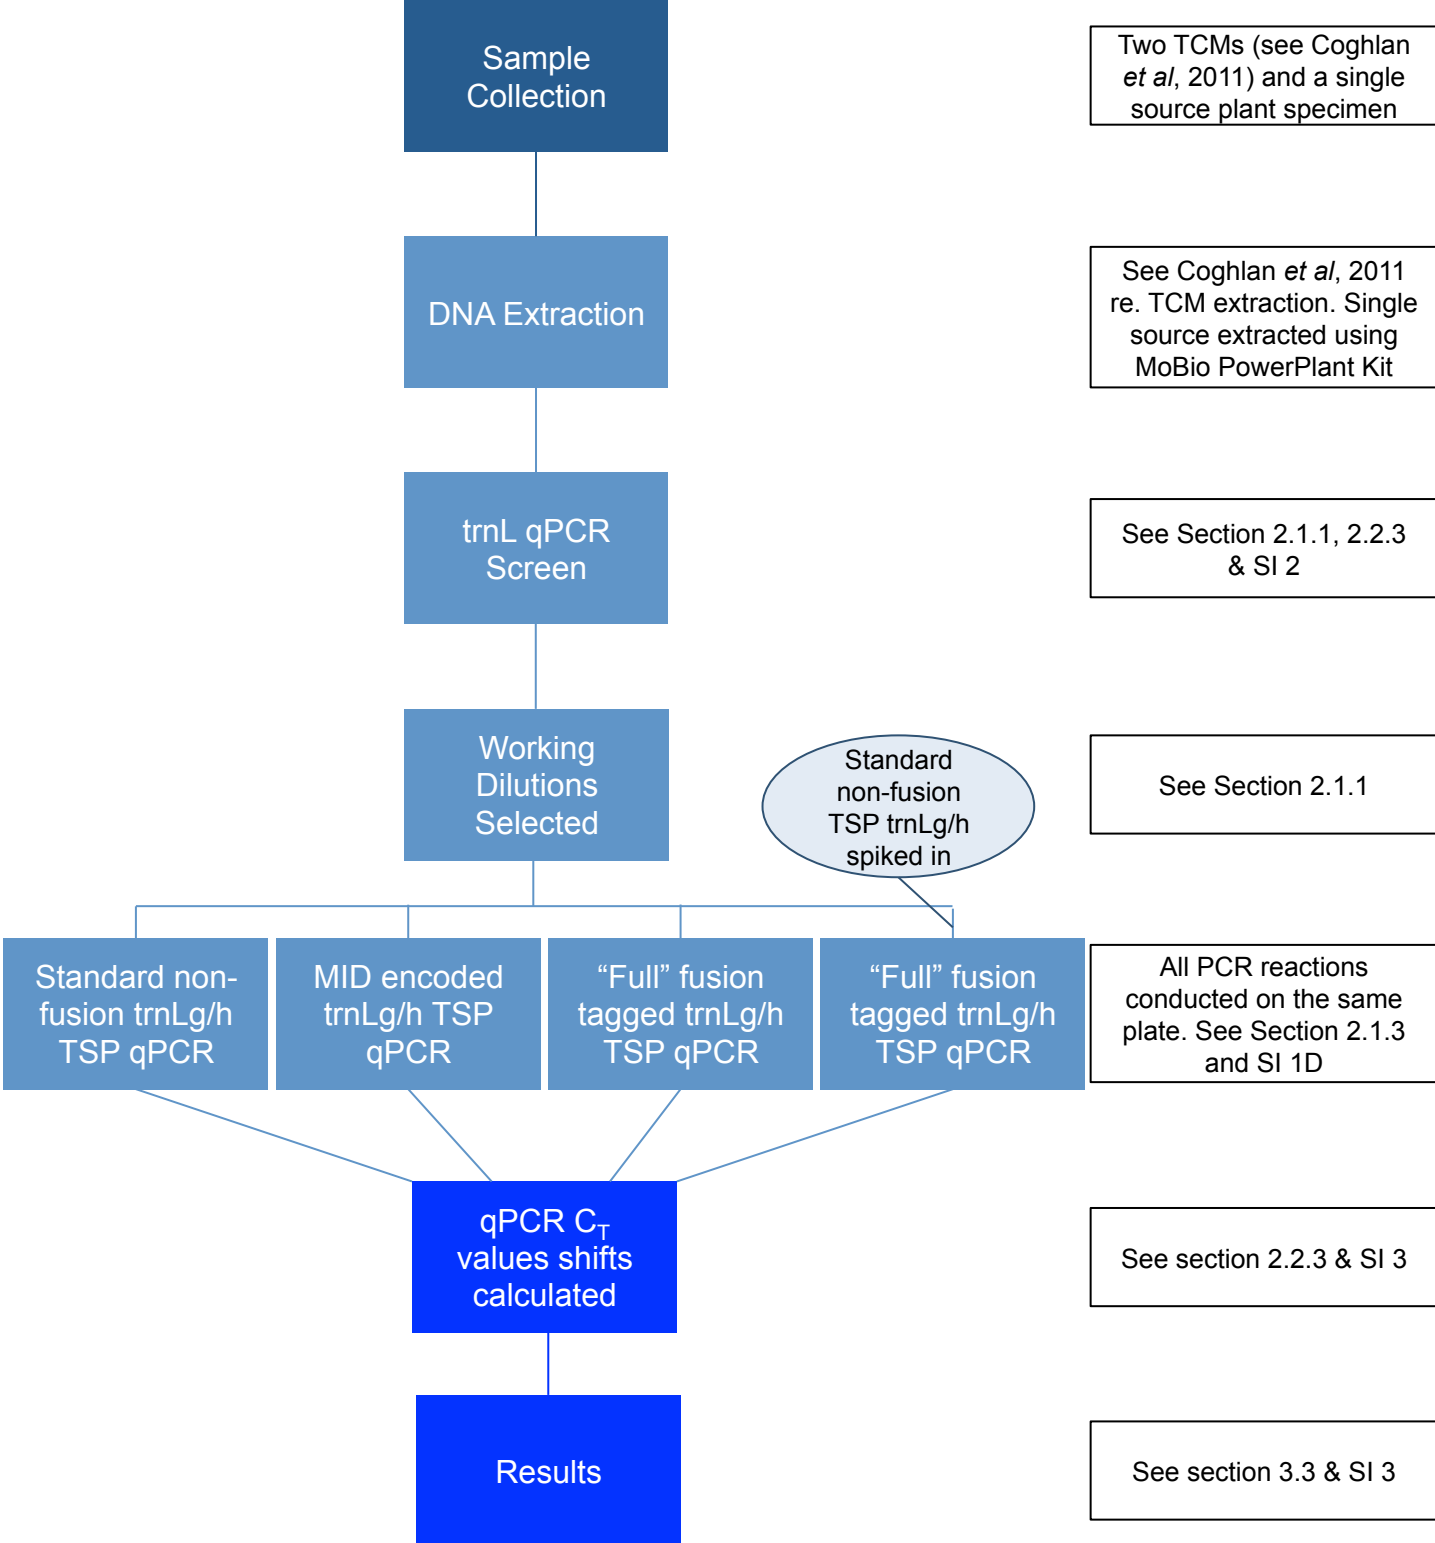

**Figure S1D. Experiment 4: Library generation efficiency.** Schematic showing steps involved in the experiment assessing the reduced efficiency of PCR amplicon generation due to long fusion-tagged primers and the amelioration of.

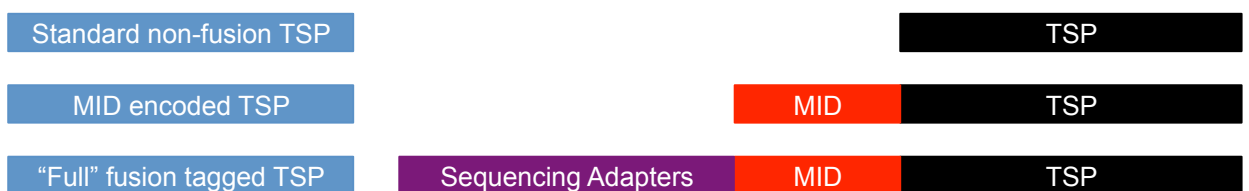

**Figure S1E. Primer Architecture.** Diagram showing the architecture of the primers used in experiments. TSP – Template specific sequence (e.g. trnLg primer); MID – Multiplex Identifier Tag (i.e. unique DNA index); Sequencing Adapters – Platform specific adapters required for clustering (MiSeq) and/or sequencing (all platforms).

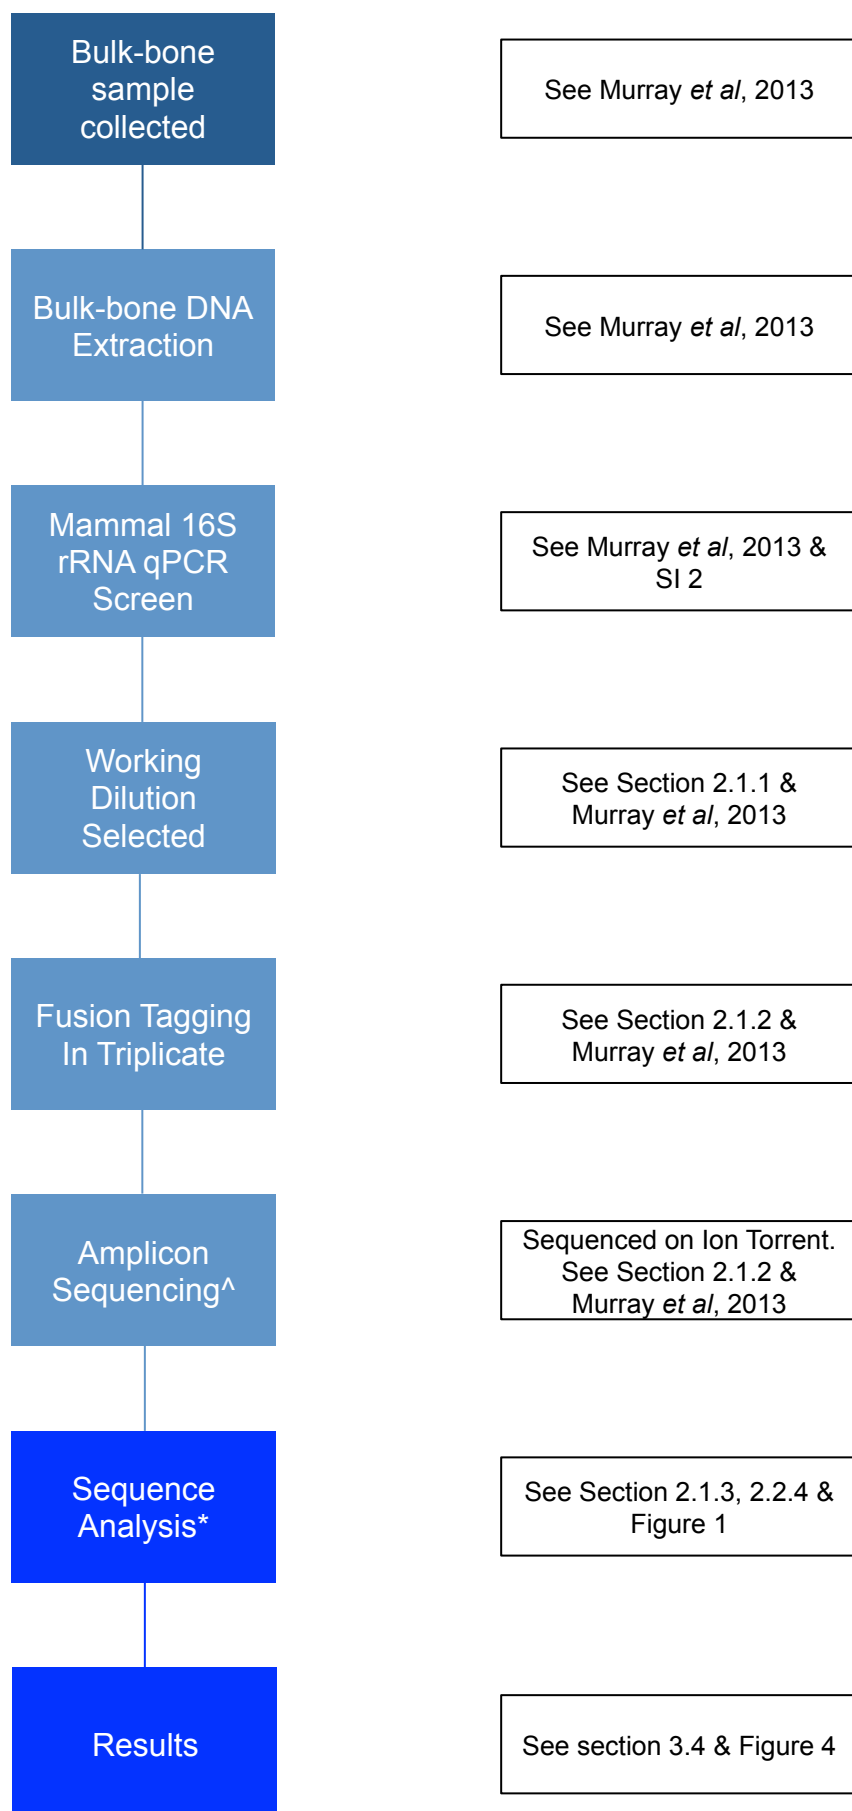

**Figure S1F. Experiment 5: Analysis parameters and their impact.** Schematic showing steps involved in the experiment illustrating how choosing different analysis parameters can impact greatly on the number of taxonomic units determined to be in a sample.
