# Supplementary material for: From Benchtop to Desktop: Important Considerations when Designing Amplicon Sequencing Workflows
Source: PubMed Central journal article supplement (PMC4406758; doi:10.1371/journal.pone.0124671), 2015-04-22
Supplement: pone.0124671.s004.pdf [file pone.0124671.s004.pdf]

**Table S1. Primer Information**

| Primer name                          | Target Taxa                                        | Sequence (5'-3')                               | Annealing temp. (°C) | Experiment | Reference |
|--------------------------------------|----------------------------------------------------|------------------------------------------------|----------------------|------------|-----------|
| 16S1F-degenerate<br>16S2R-degenerate | Fish                                               | GACGAKAAGACCCTA<br>CGCTGTTATCCCTADRGTAACT      | 54                   | 1          | 1         |
| PIL1F<br>PIL1R                       | <i>Sardinops sagax</i><br>(Australian Pilchard)    | CCTAACTGGAGCCCCAAAC<br>GCTGTGGCTCTGGGTTTTAG    | 60                   | 1          | 2         |
| AN1F<br>AN2R                         | <i>Engraulis australis</i><br>(Australian Anchovy) | CCTAAATACCCGCAGCCTTAT<br>CAACTCTCGGCTTAAGGGTTT | 60                   | 1          | 2         |
| 16Smam1<br>16Smam2                   | Mammals                                            | CGGTTGGGGTGACCTCGGA<br>GCTGTTATCCCTAGGGTAACT   | 55                   | 5          | 3         |
| 12SA<br>12SH                         | Aves                                               | CTGGGATTAGATACCCCACTAT<br>CCTTGACCTGTCTTGTTAGC | 57                   | 2          | 4<br>5    |
| Bact_16S_F515<br>Bact_16S_R806       | Bacteria                                           | GTGCCAGCMGCCGCGGTAA<br>GGACTACHVGGGTWTCTAAT    | 54                   | 4          | 6<br>7    |
| trnLg<br>trnLh                       | Plants                                             | GGGCAATCCTGAGCCAA<br>CCATTGAGTCTCTGCACCTATC    | 52                   | 3          | 8         |

Details are provided for each primer set used in this paper including the sequence, annealing temperature and taxa targeted. Additionally, the experiment in which each primer was used is given.

1. Deagle BE, Gales NJ, Evans K, Jarman SN, Robinson S, et al. (2007) Studying Seabird Diet through Genetic Analysis of Faeces: A Case Study on Macaroni Penguins (*Eudyptes chrysolophus*). PLoS ONE 2: e831.
2. Murray D, Bunce M, Cannell BL, Oliver R, Houston J, et al. (2011) DNA-based faecal dietary analysis: A comparison of qPCR and High Throughput Sequencing approaches. PLoS One 6: e25776.
3. Taylor PG (1996) Reproducibility of ancient DNA sequences from extinct Pleistocene fauna. Molecular Biology and Evolution 13: 283-285.
4. Cooper A (1994) DNA from Museum Specimens. In: Herrmann B, Hummel S, editors. Ancient DNA: Springer New York. pp. 149-165.
5. Cooper A, Lalueza-Fox C, Anderson S, Rambaut A, Austin J, et al. (2001) Complete mitochondrial genome sequences of two extinct moas clarify ratite evolution. Nature 409: 704-707.
6. Turner S, Pryer KM, Miao VP, Palmer JD (1999) Investigating deep phylogenetic relationships among cyanobacteria and plastids by small subunit rRNA sequence analysis. J Eukaryot Microbiol 46: 327-338.
7. Caporaso JG, Lauber CL, Walters WA, Berg-Lyons D, Lozupone CA, et al. (2011) Global patterns of 16S rRNA diversity at a depth of millions of sequences per sample. Proceedings of the National Academy of Sciences 108: 4516-4522.
8. Taberlet P, Coissac E, Pompanon F, Gielly L, Miquel C, et al. (2007) Power and limitations of the chloroplast trnL (UAA) intron for plant DNA barcoding. Nucleic Acids Research 35: e14.
