# Supplementary material for: From Benchtop to Desktop: Important Considerations when Designing Amplicon Sequencing Workflows
Source: PLOS journal article supplement (doi:10.1371/journal.pone.0124671), 2015-04-22
Supplement: S6 (10.1371/journal.pone.0124671.s006) [file journal.pone.0124671.s006]

**Table S3. Cycle threshold value shifts when performing fusion-tagged PCR.**

|        |                     |                           | (1)   | (2)   | GS (3) | GS (4) | IT (3) | IT (4) | MS (3) | MS (4) |
|--------|---------------------|---------------------------|-------|-------|--------|--------|--------|--------|--------|--------|
| Sample | Single Source Plant | Avg. C <sub>T</sub>       | 25.63 | 25.75 | 28.21  | 27.61  | 26.65  | 26.40  | 30.61  | 27.96  |
|        |                     | Diff. in C <sub>T</sub> 1 |       | 0.12  | 2.58   | 1.98   | 1.02   | 0.78   | 4.98   | 2.33   |
|        |                     | Diff. in C <sub>T</sub> 2 |       |       | -0.60  |        | -0.24  |        | -2.65  |        |
|        | CAM Plant Screen 1  | Avg. C <sub>T</sub>       | 22.13 | 22.57 | 23.94  | 23.63  | 23.77  | 22.88  | 25.72  | 25.65  |
|        |                     | Diff. in C <sub>T</sub> 1 |       | 0.44  | 1.80   | 1.50   | 1.63   | 0.75   | 3.59   | 3.52   |
|        |                     | Diff. in C <sub>T</sub> 2 |       |       | -0.31  |        | -0.88  |        | -0.07  |        |
|        | CAM Plant Screen 2  | Avg. C <sub>T</sub>       | 21.37 | 20.76 | 22.46  | 22.50  | 22.79  | 21.77  | 26.00  | 23.76  |
|        |                     | Diff. in C <sub>T</sub> 1 |       | -1.37 | 0.33   | 0.37   | 0.66   | -0.37  | 3.87   | 1.63   |
|        |                     | Diff. in C <sub>T</sub> 2 |       |       | 0.04   |        | -1.03  |        | -2.24  |        |

|                           |                                                    |
|---------------------------|----------------------------------------------------|
| Diff. in C <sub>T</sub> 1 | Difference in C <sub>T</sub> value compared to 1   |
| Diff. in C <sub>T</sub> 2 | Difference in C <sub>T</sub> value between 3 and 4 |

Cycle threshold values are shown for quantitative PCR reactions using one of the following: (1) - Standard non-fusion TSP; (2) - MID encoded TSP; (3) - “Full” fusion tagged TSP; (4) - “Full” fusion tagged TSP with standard non-fusion TSP spiked in (for further clarification see Section 2.2.4 of main article and S1 E Fig.) For (3) and (4) TSP sequences specific for each of the GS-Junior (GS), IonTorrent (IT) and MiSeq (MS) were used. Any the efficiency drop off associated with using "full" fusion tagged primers (3) when compared to standard non-fusion TSP (1) is shown as is whether any efficiency drop-off can be ameliorated using a spike in of standard non-fusion TSP when using "full" fusion tagged TSP (4).
